# Supplementary material for: CaMKIIδ-mediated inflammatory gene expression and inflammasome activation in cardiomyocytes initiate inflammation and induce fibrosis
Source: JCI journal article supplement (doi:10.1172/jci.insight.97054), 2018-06-20
Supplement: sd1 [file 1]

## **SUPPLEMENTAL MATERIAL**

### ***Methods***

#### *CaMKII activity assay*

CaMKII activity was measured using previously published protocols (1, 2). In brief, hearts were isolated, ventricles homogenized in lysis buffer, and immediately assayed in assay buffer containing 50 mmol/L HEPES, 10 mmol/L magnesium acetate, 1 mg/ml BSA, 20  $\mu$ mol/L Syntide-2 (a synthetic CaMKII-specific peptide substrate), 1mmol/L DTT, 400 nmol/L [ $\gamma$ - $^{32}$ P]ATP, pH 7.5, and 1 mmol/L EGTA (for measurement of autonomous activity) or 500  $\mu$ mol/L CaCl<sub>2</sub> and 1  $\mu$ mol/L calmodulin (for measurement of maximal activity). The reaction was carried out at 37°C for 10 min and blotted onto Whatman P81 phosphocellulose paper. Percent activation was calculated as the ratio of autonomous activity to maximal activity.

#### *Nuclear fractionation*

Ventricular tissue was fractionated using previously published protocols (1, 3). In brief, frozen ventricular tissue was homogenized in lysis buffer containing 70 mmol/L sucrose, 190 mmol/L mannitol, 20 mmol/L HEPES, and 200  $\mu$ mol/L EDTA using a dounce tissue grinder. Lysates were centrifuged at 600g for 10 min at 4°C. Supernatants were aspirated and pellets washed three times by resuspending pellets with lysis buffer and centrifuging at 600g for 10 min at 4°C. Supernatants were aspirated, pellets resuspended in nuclear extraction buffer containing 20 mmol/L HEPES, 25% glycerol, 420 mmol/L NaCl, 1.5 mmol/L magnesium chloride, and 200  $\mu$ mol/L EDTA and incubated on ice for 10 min. Nuclear lysates were then centrifuged at 600g for 10 min at 4°C and supernatants collected (nuclear fraction).

#### *Blood pressure readings*

Systolic and diastolic blood pressure was measured in un-anesthetized mice at baseline, 1, 3,

and 7 days Ang II infusion using a tail-cuff blood pressure system (CODA System, Kent Scientific).

Data are presented as the average of ten cycle measurements per mouse.

### ***Supplemental references***

1. Gray CB, Suetomi T, Xiang S, Mishra S, Blackwood EA, Glembotski CC, et al. CaMKIIdelta subtypes differentially regulate infarct formation following ex vivo myocardial ischemia/reperfusion through NF-kappaB and TNF-alpha. *J Mol Cell Cardiol.* 2017;103:48-55.
2. Grimm M, Ling H, Willeford A, Pereira L, Gray CB, Erickson JR, et al. CaMKIIdelta mediates beta-adrenergic effects on RyR2 phosphorylation and SR Ca(2+) leak and the pathophysiological response to chronic beta-adrenergic stimulation. *J Mol Cell Cardiol.* 2015;85:282-91.
3. Miyamoto S, Purcell NH, Smith JM, Gao T, Whittaker R, Huang K, et al. PHLPP-1 negatively regulates Akt activity and survival in the heart. *Circ Res.* 2010;107(4):476-84.

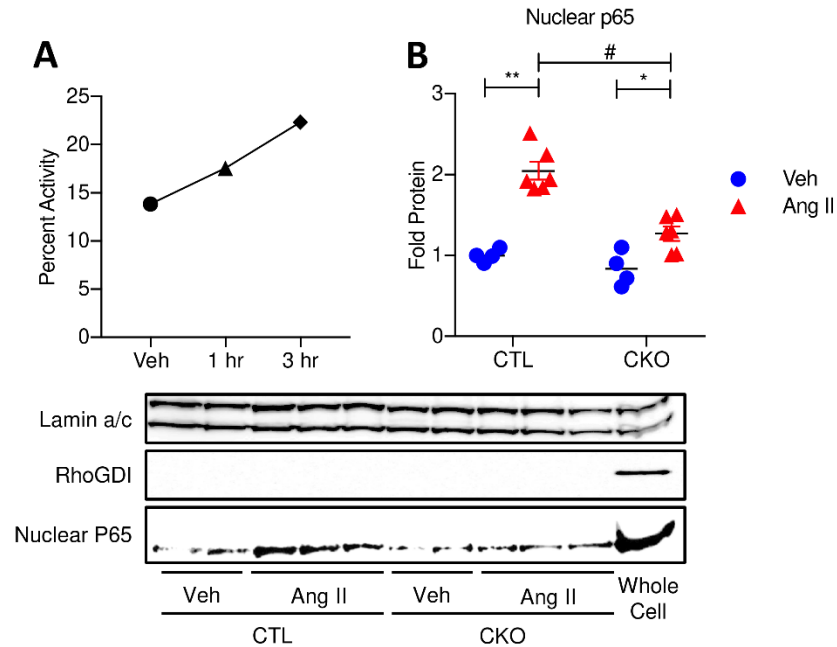

**Supplemental Figure 1. Angiotensin II infusion activates CaMKII $\delta$  and elicits NF $\kappa$ B signaling through CaMKII $\delta$ .** (A) Autonomous CaMKII activity measured in ventricular lysates of mice infused with saline (Veh) or Ang II for 1 and 3 hours using a  $^{32}$ P enzymatic CaMKII activity assay. (B) Western blot and quantitation of the nuclear factor kappa B subunit P65 in nuclear fractions isolated from hearts of *Camk2d<sup>fl/fl</sup>* control (CTL) and cardiomyocyte-specific CaMKII $\delta$  knockout (CKO) mice after 3 hours of saline (Veh) or Ang II (1.5  $\mu$ g/kg/min) infusion (n=4-6 each group). Lamin a/c was used as a nuclear loading control and RhoGDI was used as a nuclear fraction purity control. Two-way ANOVA was used for all comparisons. \* $P$ <0.05 vs Veh, \*\* $P$ <0.01 vs Veh, # $P$ <0.05 CTL Ang II vs CKO Ang II.

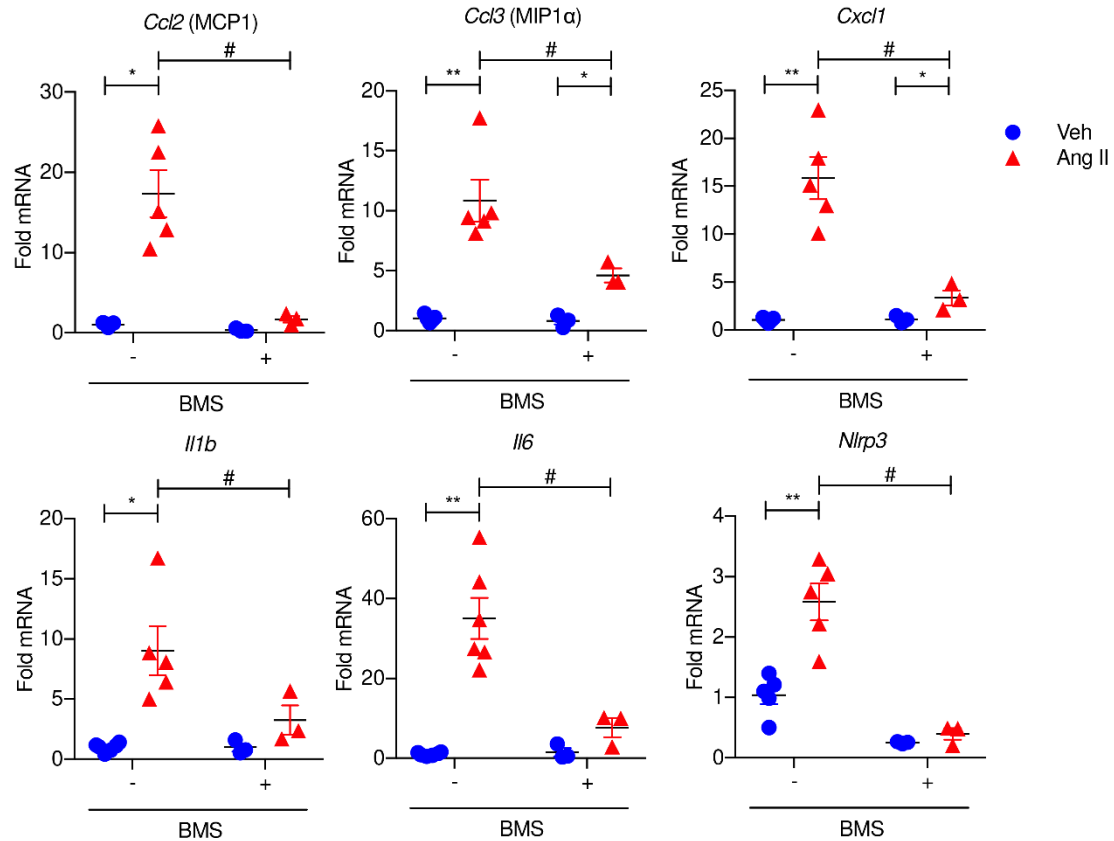

**Supplemental Figure 2. Angiotensin II infusion induces inflammatory gene expression through NF $\kappa$ B.** mRNA expression of monocyte chemoattractant protein 1 (*Ccl2*/MCP1), macrophage inflammatory protein 1 $\alpha$  (*Ccl3*/MIP1 $\alpha$ ), C-X-C motif ligand 1 (*Cxcl1*), interleukin 1 $\beta$  (*Il1b*) interleukin 6 (*Il6*), and *NLRP3* in ventricular lysates of *Camk2d*<sup>f/f</sup> control mice infused with saline or Ang II (1.5  $\mu$ g/kg/min) for 3 hours and injected intraperitoneally with water (-) or 45 mg/kg BMS-345541 (+) 1 hour prior to Ang II infusion (n=3-6 each group). Two-way ANOVA was used for all comparisons. \* $P$ <0.05 vs Veh, \*\* $P$ <0.01 vs Veh, # $P$ <0.05 Ang II vs Ang II + BMS.

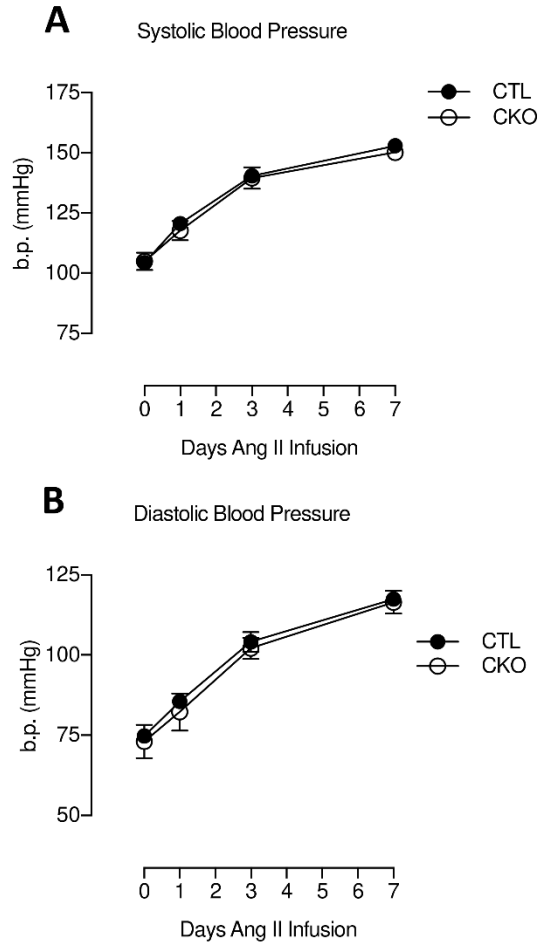

**Supplemental Figure 3. Angiotensin II infusion increases blood pressure to similar extents in *Camk2d<sup>fl/fl</sup>* control and cardiomyocyte-specific CaMKII $\delta$  KO mice.** Systolic (A) and diastolic (B) blood pressure measured in un-anesthetized mice at baseline, 1, 3, and 7 days Ang II (1.5  $\mu$ g/kg/min) infusion (n=10 each group).

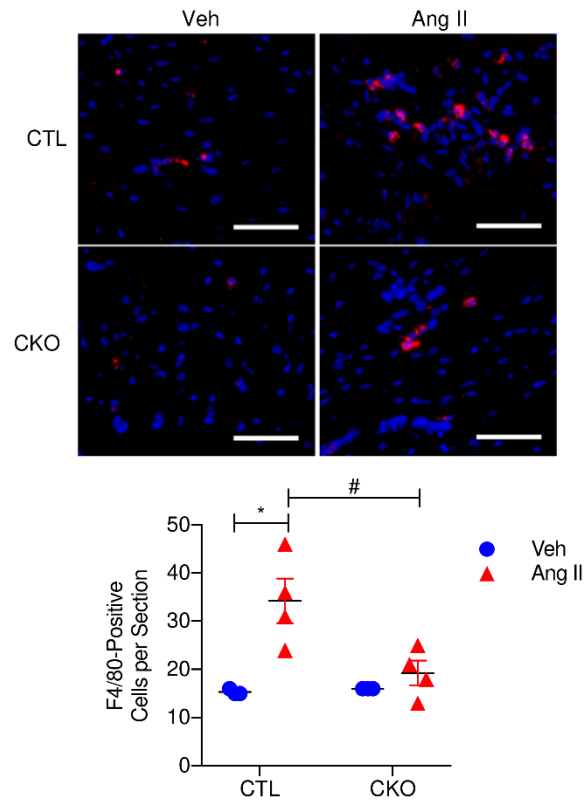

**Supplemental Figure 4. Angiotensin II recruits F4/80-positive macrophages through cardiomyocyte CaMKIIδ.** Representative pictures and quantitation of cardiac cryosections stained with antibody to the mature macrophage marker F4/80 taken from *Camk2d<sup>fl/fl</sup>* control (CTL) and cardiomyocyte-specific CaMKIIδ KO (CKO) mice infused with saline (Veh) or Ang II (1.5 µg/kg/min) for 1 day (n=3-4 each group). F4/80 is red and DAPI is blue. Two-way ANOVA was used for all comparisons. \* $P < 0.05$  vs Veh, # $P < 0.05$  CTL Ang II vs CKO Ang II. Scale bar=50 µm.

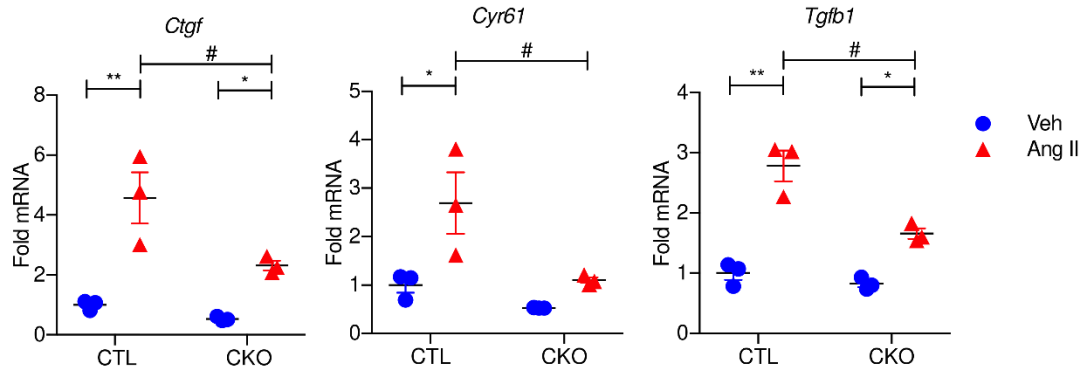

**Supplemental Figure 5. Angiotensin II induces profibrotic mediator expression through CaMKII $\delta$  signaling in the cardiomyocyte.** mRNA expression of CCN family member 1/cysteine-rich angiogenic factor 61 (*Cyr61*), CCN family member 2/connective tissue growth factor (*Ctgf*), and transforming growth factor  $\beta$ 1 (*Tgfb1*) in ventricular lysates of *Camk2d<sup>fl/fl</sup>* control (CTL) and cardiomyocyte-specific CaMKII $\delta$  knockout (CKO) mice after 7 days of saline (Veh) or Ang II (1.5  $\mu$ g/kg/min) infusion (n=3 each). Two-way ANOVA was used for all comparisons. \* $P$ <0.05 vs Veh, \*\* $P$ <0.01 vs Veh, # $P$ <0.05 CTL Ang II vs CKO Ang II.



# Full unedited blot for Figure 1C

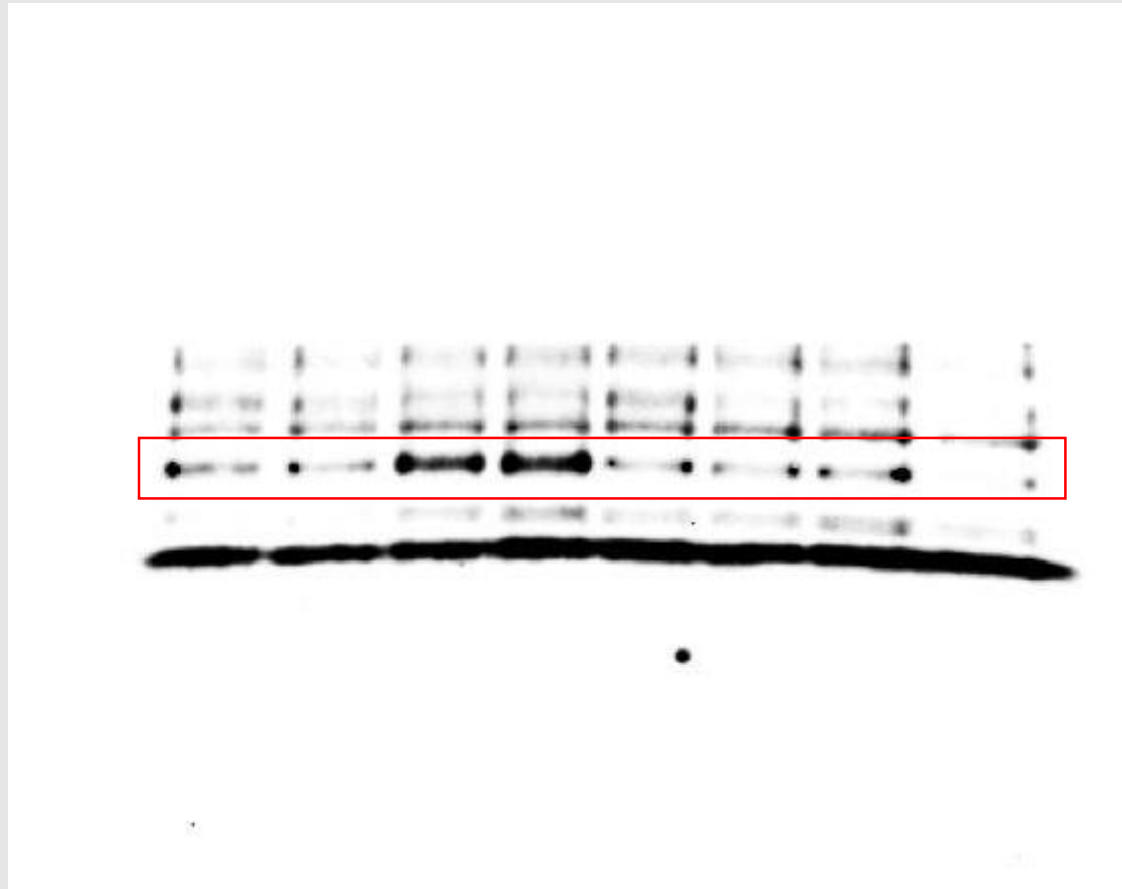

MCP-1

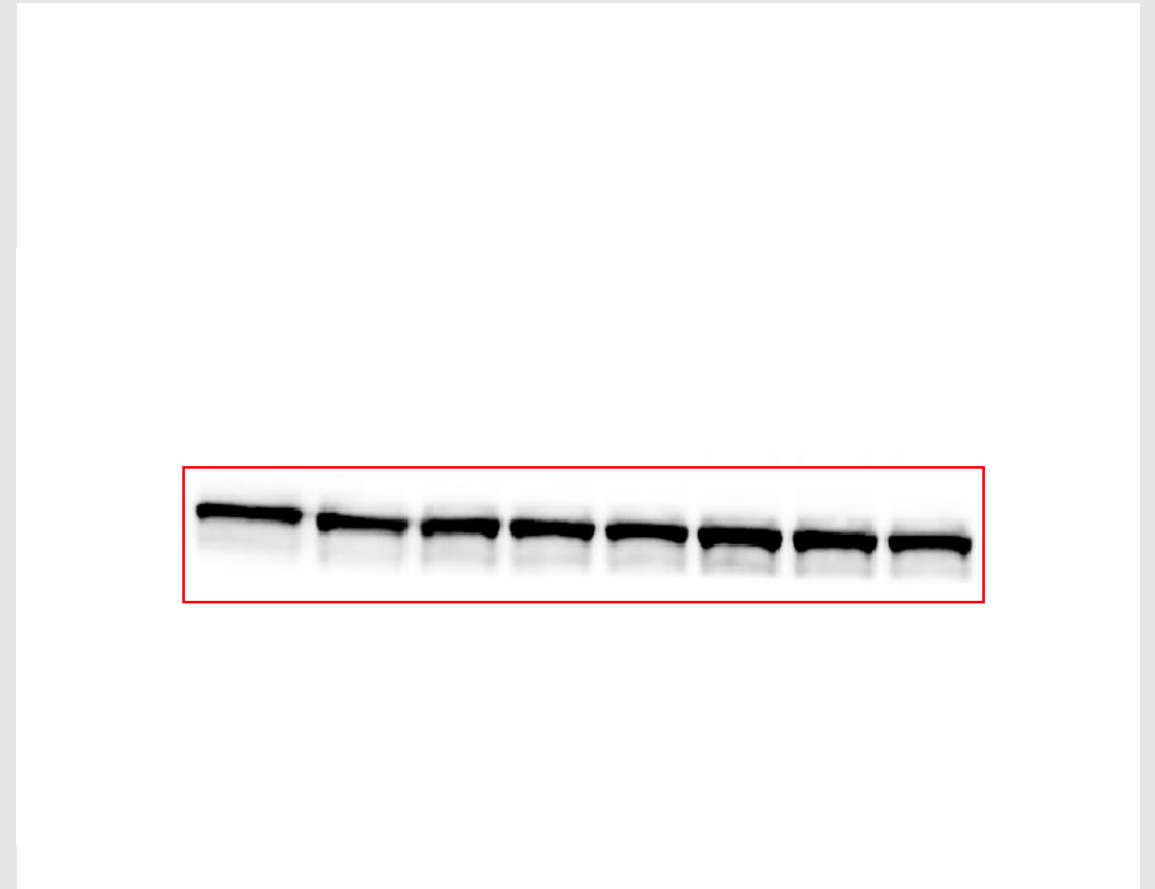

GAPDH

Lanes that are presented in the submission are highlighted by a red square

## Full unedited blot for Figure 2C

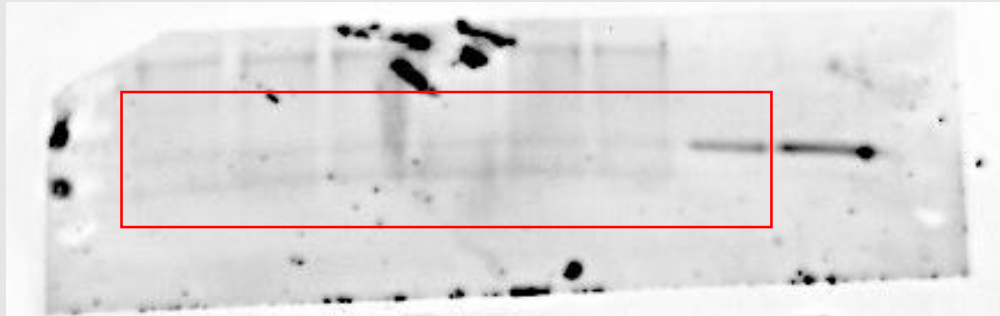

Cleaved Caspase 3

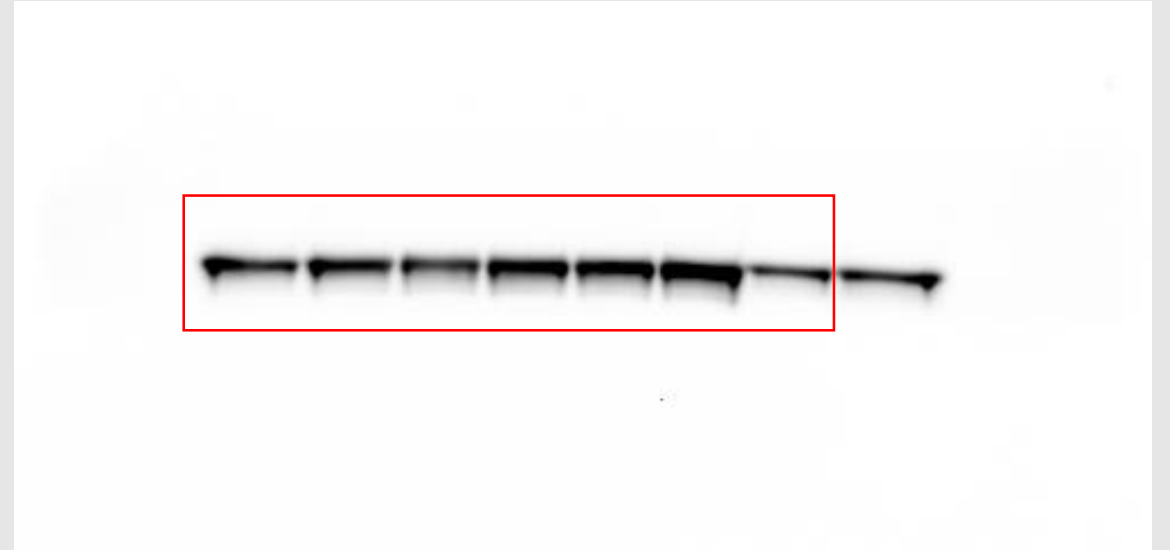

GAPDH

Lanes that are presented in the submission are highlighted by a red square

# Full unedited blot for Figure 4A

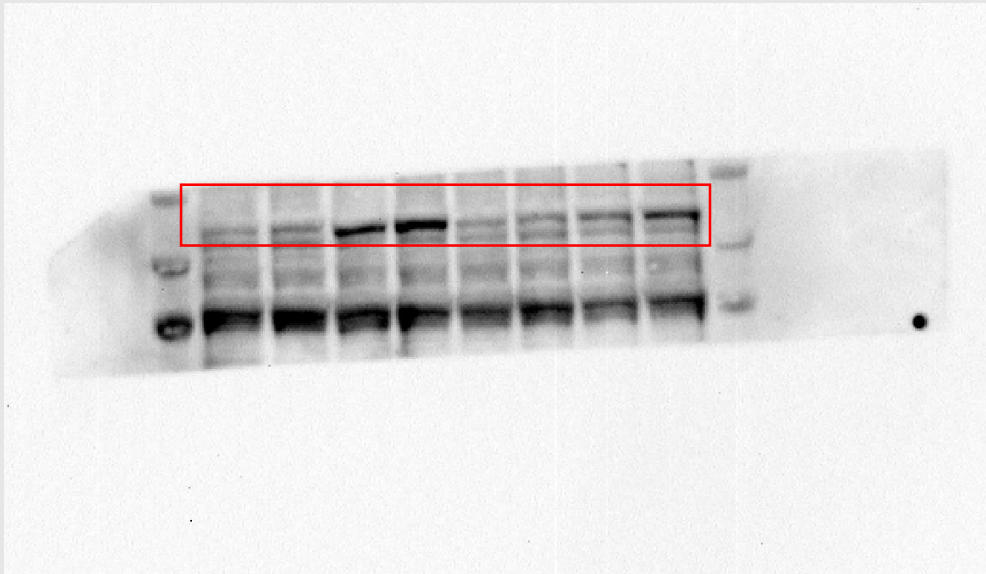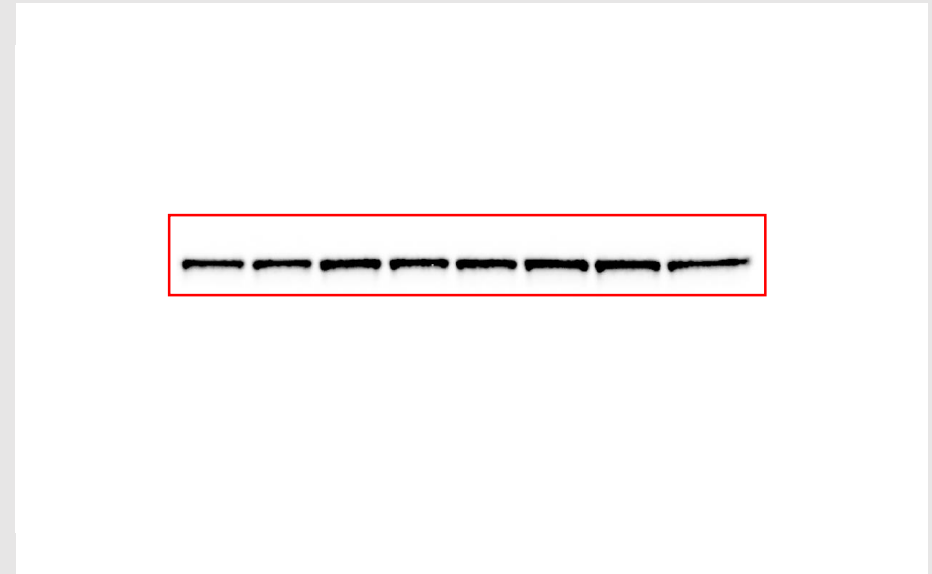

Lanes that are presented in the submission are highlighted by a red square

## Full unedited blot for Figure 4B

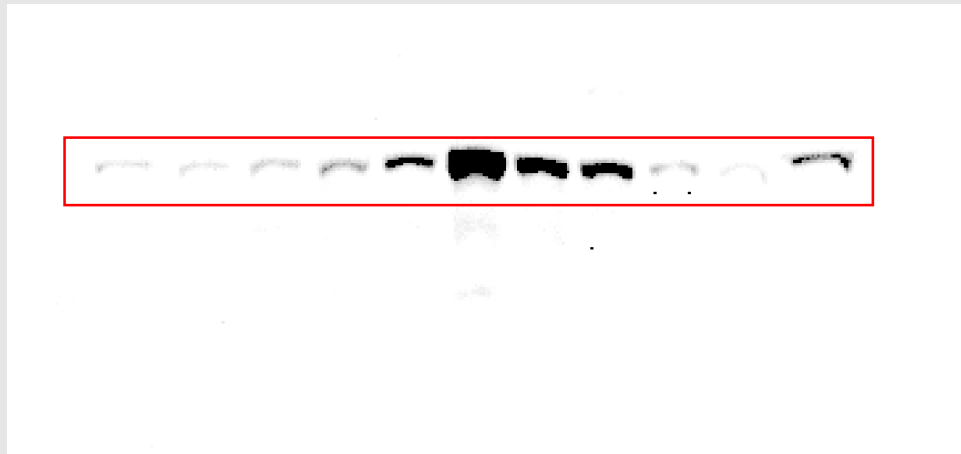

NLRP3

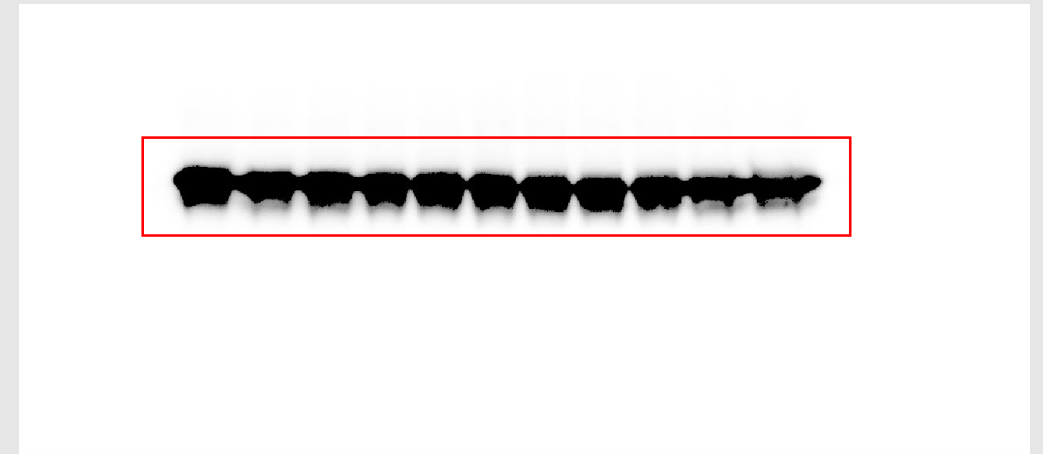

GAPDH

Lanes that are presented in the submission are highlighted by a red square

## Full unedited blot for Figure 5B

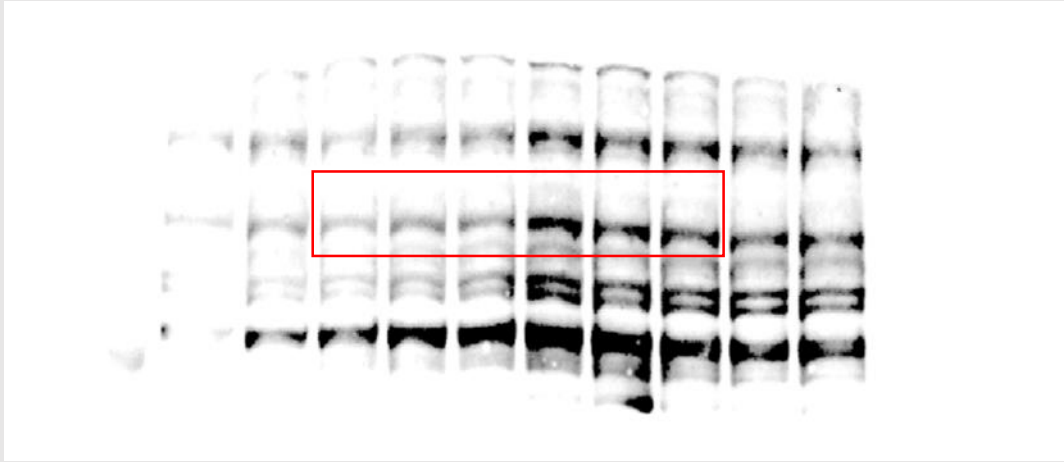

NLRP3

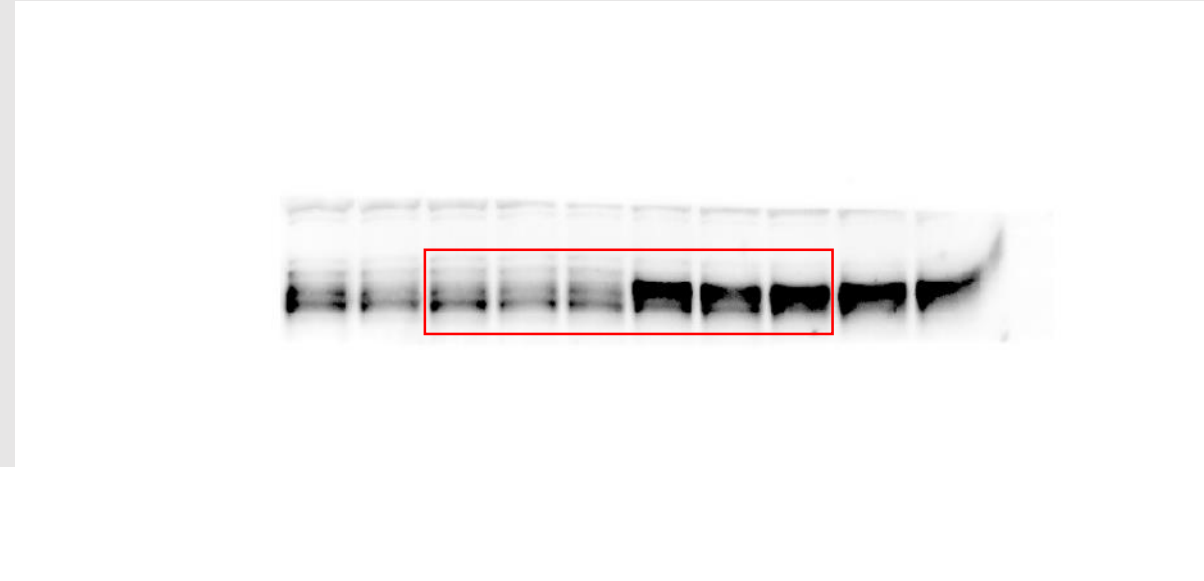

tCaMKIIδ

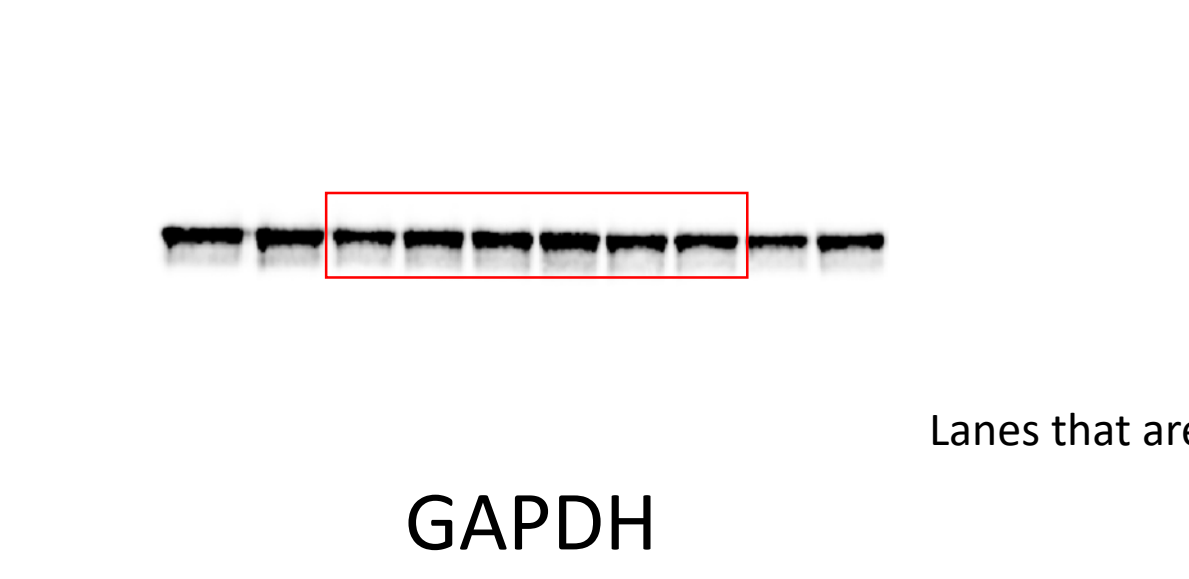

GAPDH

Lanes that are presented in the submission are highlighted by a red square

# Full unedited blot for Figure 7A

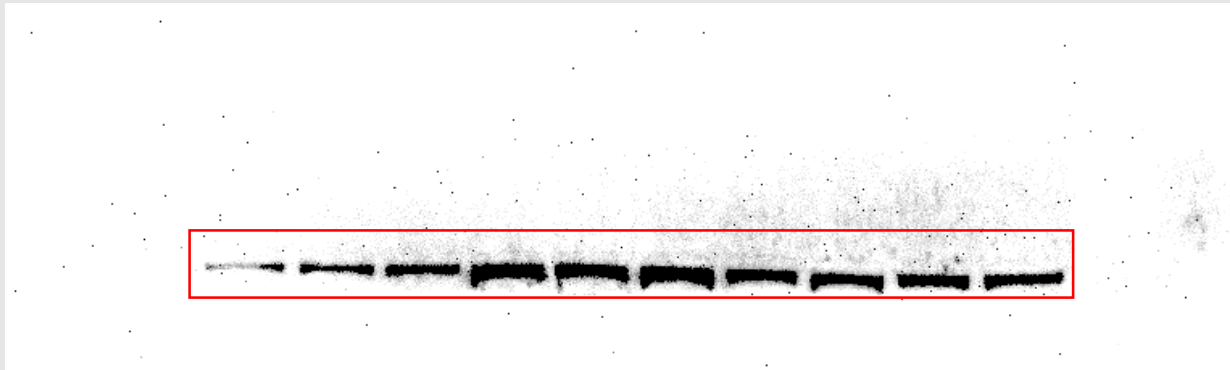

NLRP3

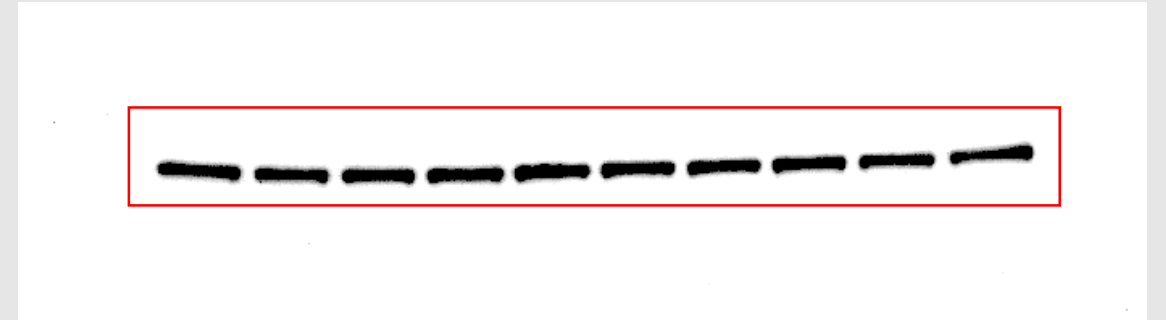

GAPDH

Lanes that are presented in the submission are highlighted by a red square

# Full unedited blot for Supplemental Figure 1B

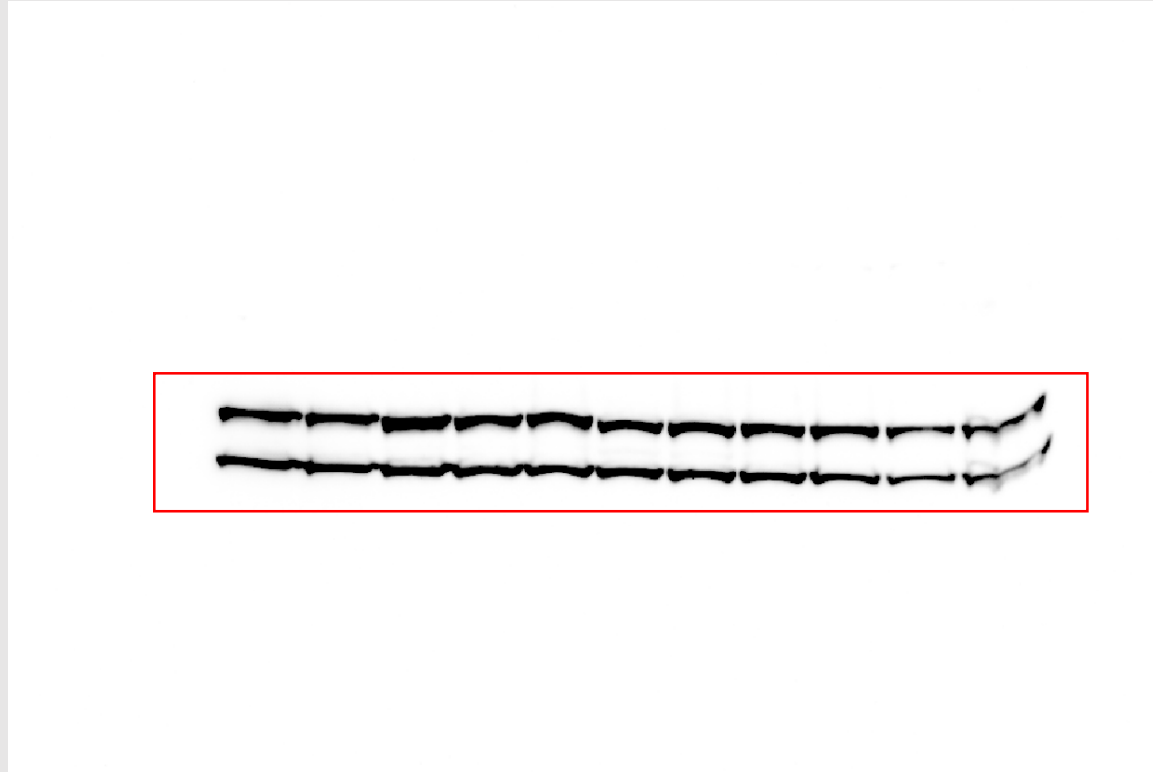

Lamin a/c

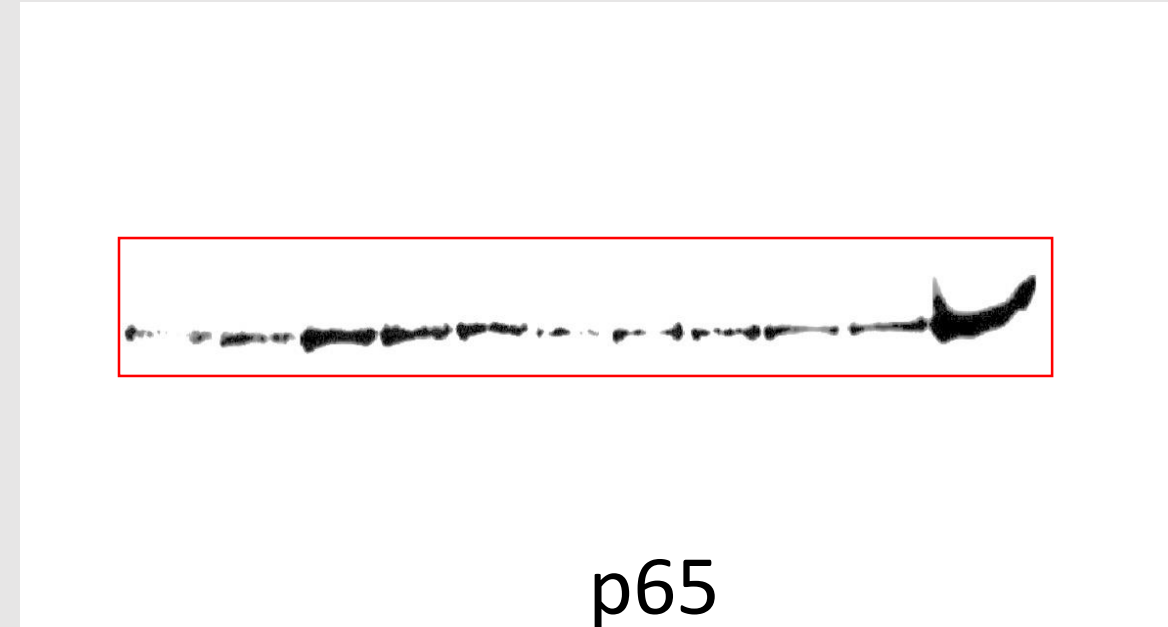

p65

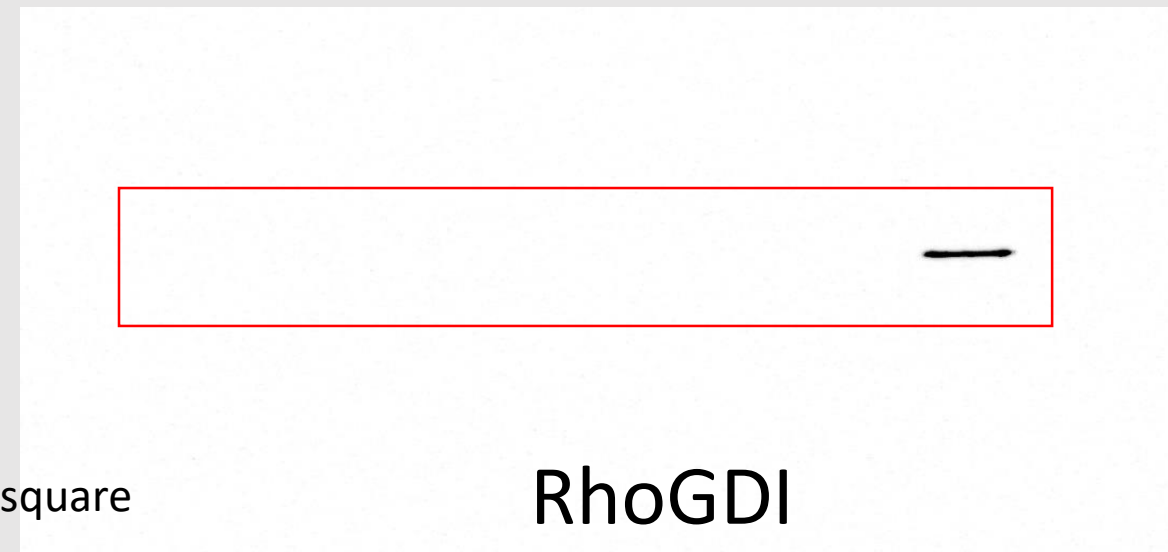

RhoGDI

Lanes that are presented in the submission are highlighted by a red square
